# Supplementary material for: Dual-functional porous MOFs with hierarchical guest encapsulation for room-temperature phosphorescence and white-light-emission
Source: Royal Society of Chemistry journal article supplement (doi:10.1039/d1nr03006j), 2021-01-01
Supplement: d1nr03006j1.pdf [file d1nr03006j1.pdf]

**Dual-Functional Porous MOFs with Hierarchical Guest Encapsulation for  
Room-Temperature Phosphorescence and White-Light-Emitting**

*Jiangyan Yuan<sup>+</sup>, Guangyuan Feng<sup>+</sup>, Jie Dong,\* Shengbin Lei\* and Wenping Hu*

J.Y. Yuan, G.Y. Feng, Dr. J. Dong, Prof. S.B. Lei, Prof. W.P. Hu

School of Science & Collaborative Innovation Center of Chemical Science and  
Engineering, Department of Chemistry, Tianjin University, Tianjin 300072, China

E-mail: [dongjie2018@tju.edu.cn](mailto:dongjie2018@tju.edu.cn), [shengbin.lei@tju.edu.cn](mailto:shengbin.lei@tju.edu.cn).



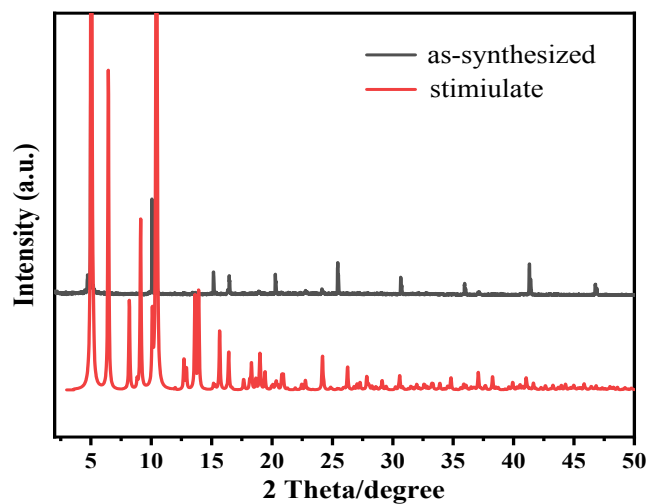

**Figure S1.** PXRD of PCN-921:as-synthesized (black line) and stimulate (red line). Some diffraction peaks of the simulated curve are absent in the as-synthesized curve due to the crystal orientation. This phenomenon is consistent with the previous literature.<sup>[1]</sup>

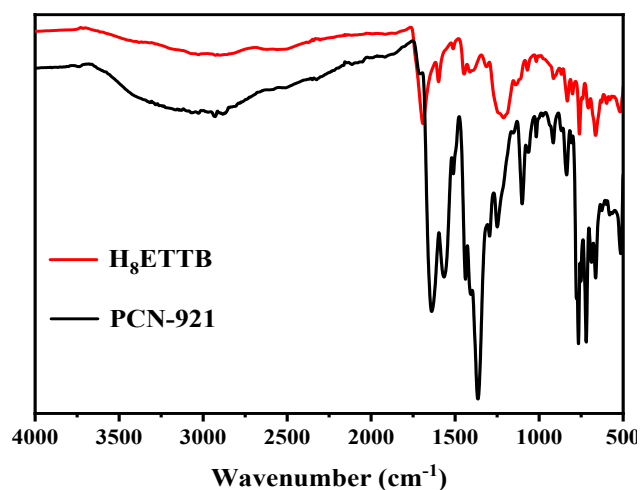

**Figure S2.** IR of H<sub>8</sub>ETTB (red line) and PCN-921 (black line).

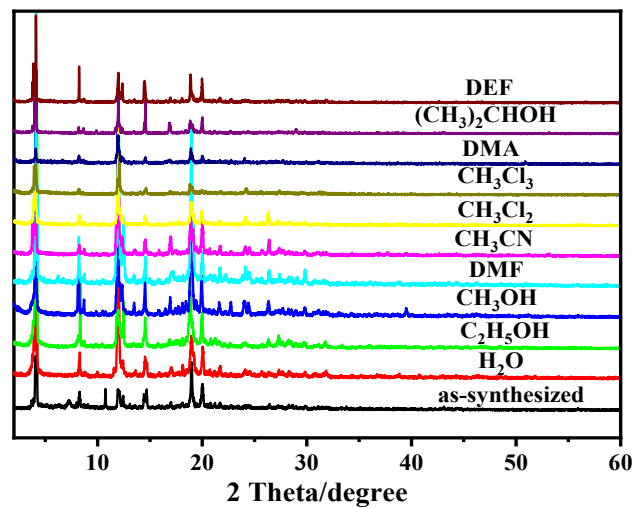

**Figure S3.** PXRD of PCN-921 MOF in different solvents.

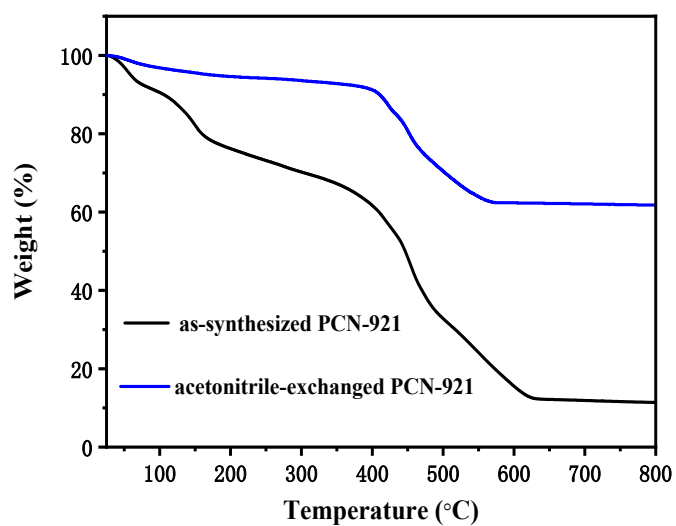

**Figure S4.** TGA of PCN-921 MOF before (black line) and after (blue line) acetonitrile-exchanged.

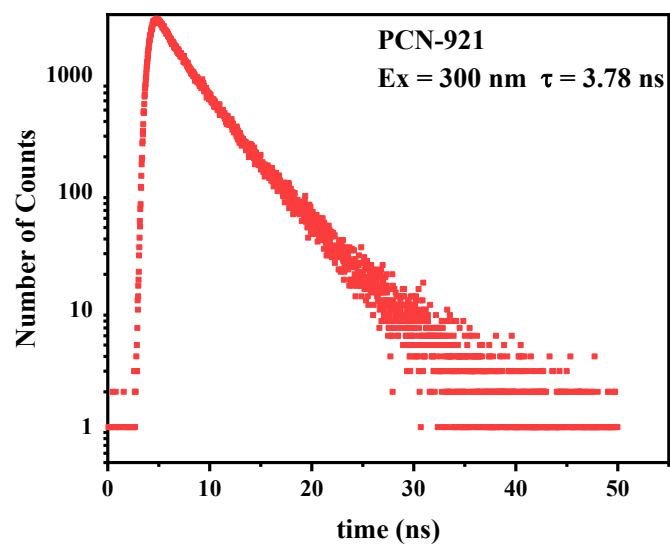

Figure S5. Fluorescence lifetime 3.78 ns of PCN-921 at Ex: 300 nm.

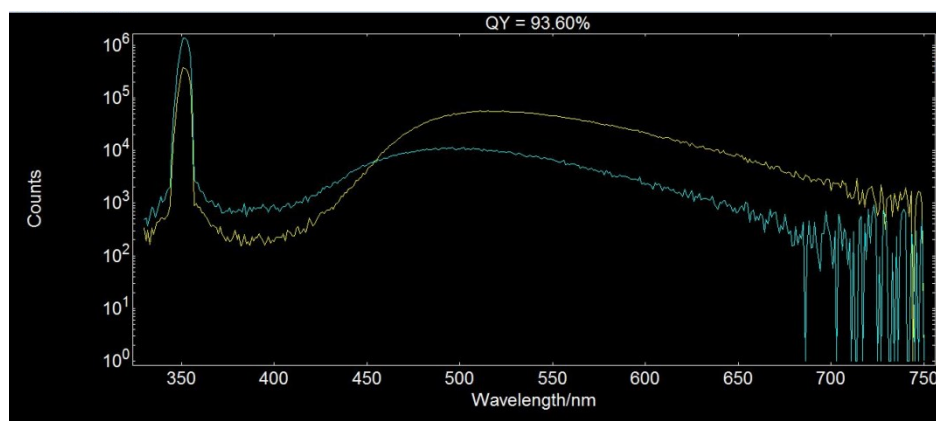

Figure S6. Quantum yield 93.6% of PCN-921 MOF.

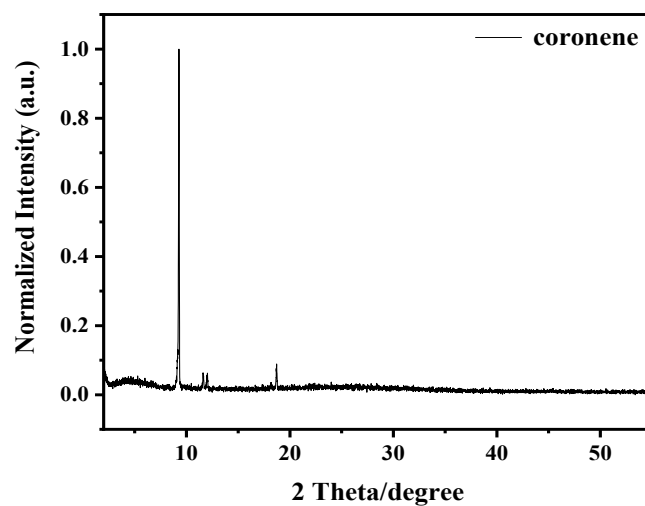

**Figure S7.** PXRD of coronene.

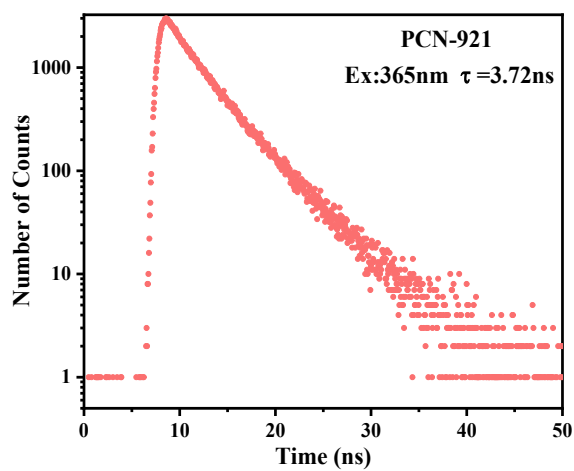

**Figure S8.** Phosphorescent lifetime 3.72 ns of PCN-921 MOF.

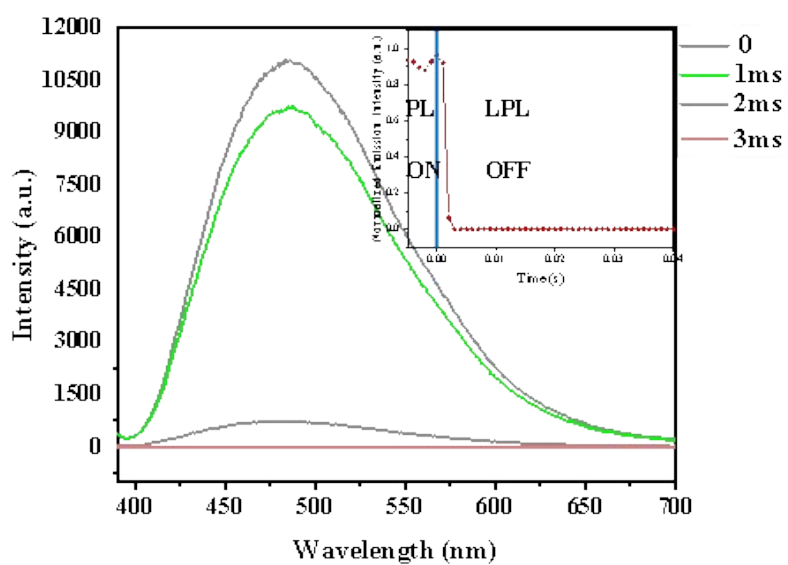

**Figure S9.** The instantaneous phosphor of PCN-921. There is almost no long afterglow.

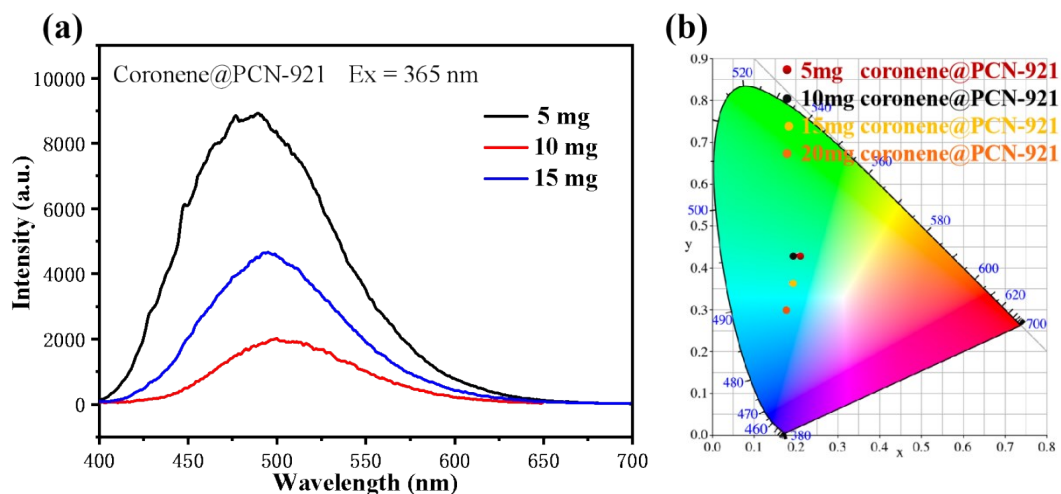

**Figure S10.** (a) fluorescence of package x mg-coronene@PCN-921 with different contents. (b) CIE: 5mg coronene@PCN-921 (0.30,0.39) (Brick red), 10mg coronene@PCN-921 (0.28,0.38) (Black), 15mg coronene@PCN-921 (0.26,0.36) (Origin), 20mg coronene@PCN-921 (0.25,0.29) (Red).

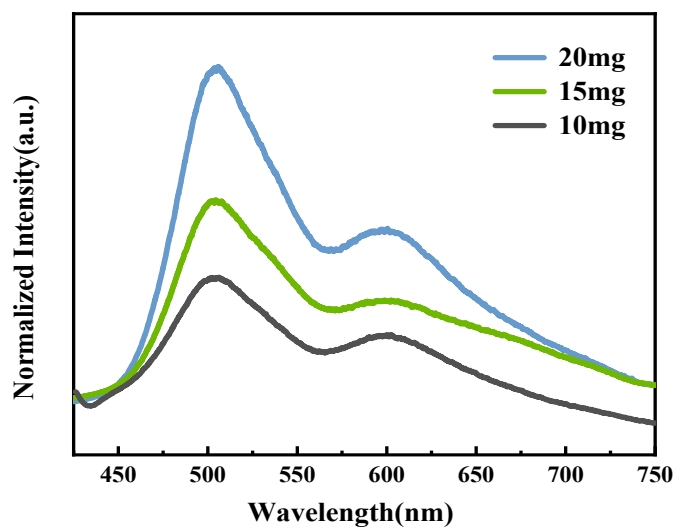

**Figure S11.** Phosphorescence of different amounts of coronene were encapsulated.

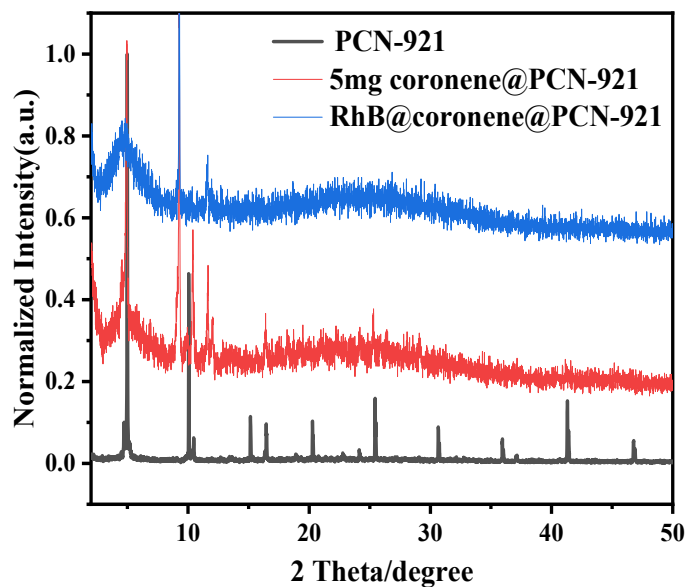

**Figure S12.** PXRD of PCN-921 (black line), 5mg coronene@PCN-921 (red line) and 0.06wt% RhB@coronene@PCN-921 (blue line).

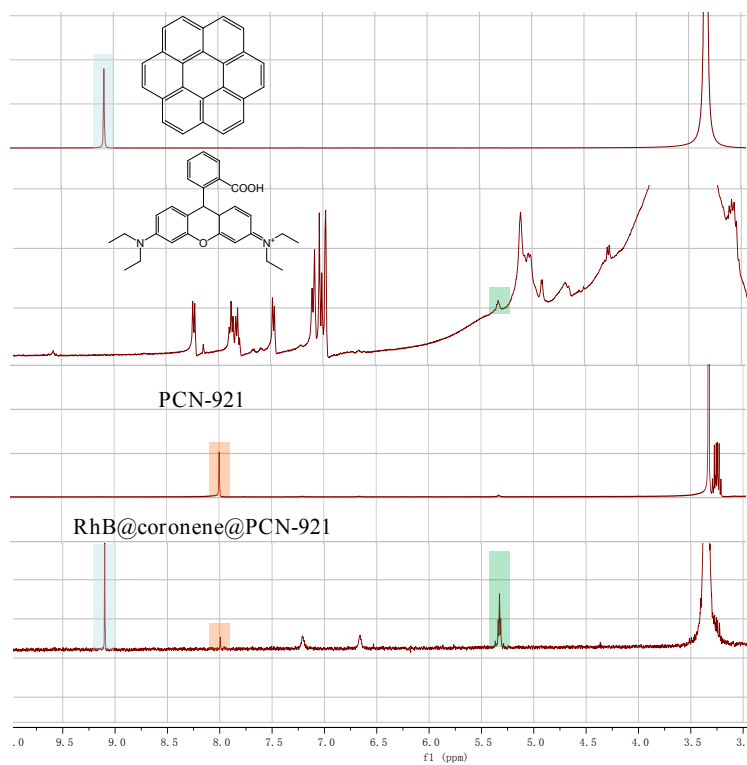

**Figure S13.**  $^1\text{H}$  NMR spectra of coronene, RhB, PCN-921, and RhB@coronene@PCN-921 contained DMSO- $d_6$ .



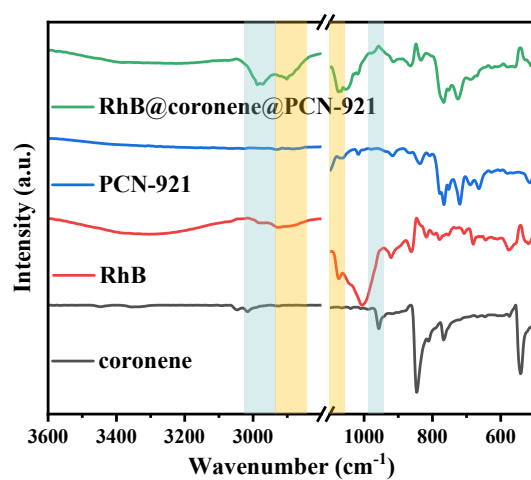

**Figure S14.** IR of coronene, RhB, PCN-921, and RhB@coronene@PCN-921.

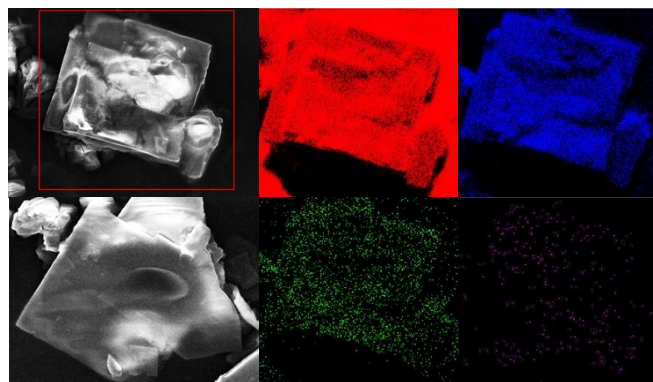

**Figure S15.** SEM-EDS mapping of RhB@coronene@PCN-921.

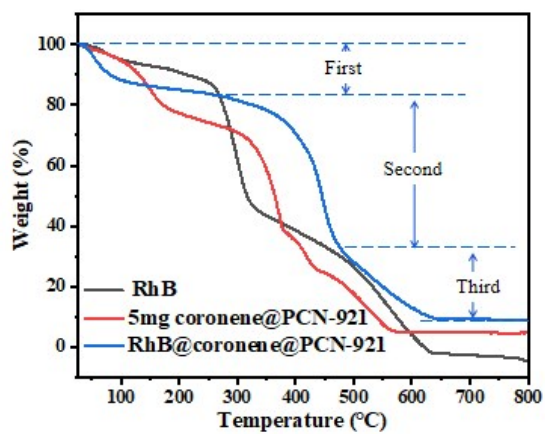

**Figure S16.** TGA of RhB, 5mg coronene@PCN-921 and RhB@coronene@PCN-921.

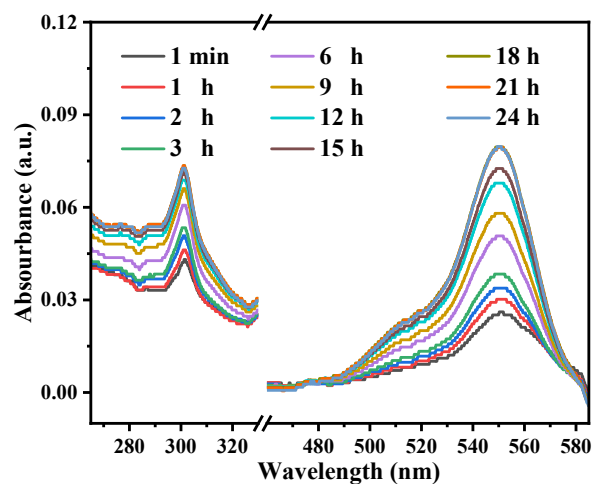

**Figure S17.** UV-Vis leaching test of RhB@coronene@PCN-921.

**Table S1.** Fluorescence lifetime 3.78 ns of PCN-921 MOF.

| Param    | Value<br>s | Std.<br>Dev.ns | Param    | Value    | Std.<br>Dev. | Rel.% |
|----------|------------|----------------|----------|----------|--------------|-------|
| $\tau_1$ | 2.4750     | 0.06896        | B1       | 1744.662 | 90.1142      | 41.20 |
| $\tau_2$ | 4.6931     | 0.08466        | B2       | 1312.974 | 94.8295      | 58.80 |
|          |            |                | A        | 0.182    |              |       |
|          |            |                | $\chi^2$ | 1.124    |              |       |

Fitting Range Low 198

Fitting Range High 1640

**Table S2.** The encapsulated guest molecules in RTP and WLED MOFs materials.

| Name | Ligand | Coordinated<br>metal ions | Guests | Phospho<br>r-<br>escence<br>lifetime<br>(ms) | LED(Q<br>Y) | Ref. |
|------|--------|---------------------------|--------|----------------------------------------------|-------------|------|
|------|--------|---------------------------|--------|----------------------------------------------|-------------|------|

|                                                                                                      |                                                                                     |                                      |                                                                                      |                 |                |        |
|------------------------------------------------------------------------------------------------------|-------------------------------------------------------------------------------------|--------------------------------------|--------------------------------------------------------------------------------------|-----------------|----------------|--------|
| Zn(II) based coordination polymer (CP)                                                               | 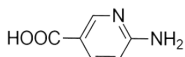   | Zn <sup>2+</sup>                     | -                                                                                    | 2000(10 K)      | -              | 2      |
| Eu-Cd-CP                                                                                             |    | Zn <sup>2+</sup><br>Cd <sup>2+</sup> | Eu <sup>3+</sup>                                                                     | 454(RT)         | -              | 3<br>3 |
| {(H <sub>2</sub> Bpy)[Cd <sub>3</sub> (BTC) <sub>2</sub> ]·2H <sub>2</sub> O} <sub>n</sub>           |    | Cd <sup>2+</sup>                     | H <sub>2</sub> Bpy <sup>2+</sup> (H <sub>2</sub> Bpy=deprotonated 4,4'-bipyridin)    | Two months (RT) | -              | 4      |
| ZIF-8 and MOF-5                                                                                      |    | Zn <sup>2+</sup>                     |    | 0.0184 (77K)    | -              | 5      |
| Cu <sub>4</sub> I <sub>4</sub> and [Cu <sub>3</sub> Pz <sub>3</sub> ] <sub>2</sub> (Pz=pyrazolate)   |    | Cu <sup>+</sup>                      | Cu <sub>4</sub> I <sub>4</sub>                                                       | 0.0152 (50K)    | -              | 6      |
| [Ag <sub>3</sub> (dmtrz) <sub>2</sub> (CN) <sub>n</sub> ]                                            |  | Ag <sup>+</sup>                      | -                                                                                    | 25.6 (RT)       | -              | 7      |
| Zn(II)-based MOFs                                                                                    |  | Zn <sup>2+</sup>                     |   | 0.15 (RT)       | -              | 8      |
| [Cd <sub>2</sub> (ptz)(squate)(OH)(H <sub>2</sub> O) <sub>2</sub> ] <sub>n</sub>                     |  | Cd <sup>2+</sup>                     |  | 0.13 (RT)       | -              | 9      |
| ZIF-8                                                                                                |  | Zn <sup>2+</sup>                     | -                                                                                    | 0.11 (RT)       | White (4.73%)  | 10     |
| [(Ag <sub>4</sub> I <sub>4</sub> )(bix) <sub>n</sub> ]<br>(bix=1,4-bis(imidazole-1-ylmethyl)benzene) |  | Ag <sup>+</sup>                      | -                                                                                    | 1.26 (10K)      | -              | 11     |
| [AgL] <sub>n</sub> ·nH <sub>2</sub> O<br>(L = 4-cyanobenzoate)                                       |  | Ag <sup>+</sup>                      | -                                                                                    | 2.60 (RT)       | White (10.86%) | 12     |

|                                                                                                                                      |                                                                                     |                  |                                                                                    |                   |   |    |
|--------------------------------------------------------------------------------------------------------------------------------------|-------------------------------------------------------------------------------------|------------------|------------------------------------------------------------------------------------|-------------------|---|----|
| e)                                                                                                                                   |                                                                                     |                  |                                                                                    |                   |   |    |
| [Ag(tz)] <sub>∞</sub> (tz= triazole)                                                                                                 |    | Ag <sup>+</sup>  | -                                                                                  | 4.59 (RT)         | - | 13 |
| [CdLi(IPA) <sub>2</sub> ](Me <sub>2</sub> NH <sub>2</sub> ) (IPA = isophthalic acid, Me <sub>2</sub> NH <sub>2</sub> = dimethylamin) |    | CdLi             | -                                                                                  | 32 (RT)           | - | 14 |
|                                                                                                                                      |                                                                                     | Mn               | -                                                                                  | 1.6-10.5 (RT)     | - | 15 |
| e)                                                                                                                                   |                                                                                     |                  |                                                                                    |                   |   |    |
| [Cd(μ-mimc) <sub>2</sub> (H <sub>2</sub> O)] <sub>n</sub>                                                                            |    | Cd <sup>2+</sup> | -                                                                                  | 250 and 430 (10K) | - | 16 |
| {[Cd <sub>3</sub> (μ <sub>5</sub> -btc) <sub>2</sub> (μ-pbptz)]·2DMF} <sub>n</sub>                                                   |    | Cd <sup>2+</sup> |  | 170 and 760 (10K) | - | 17 |
| [Zn(μ-6ani) <sub>2</sub> ] <sub>n</sub>                                                                                              |  | Zn <sup>2+</sup> | -                                                                                  | 430-1110(10K)     | - | 2  |
|                                                                                                                                      |                                                                                     | Cd <sup>2+</sup> | -                                                                                  | 340-830 (10K)     | - | 17 |
|                                                                                                                                      |                                                                                     |                  |                                                                                    | 290(RT)           |   | 17 |
| [Pb <sub>2</sub> (EBTC)(DMSO) <sub>3</sub> ]                                                                                         |  | Pb <sup>2+</sup> | -                                                                                  | 4.17 (10K)        | - | 18 |
| Cd(II)-based                                                                                                                         |  | Zn <sup>2+</sup> | -                                                                                  | 202(RT)           | - | 19 |
|                                                                                                                                      |                                                                                     | Cd <sup>2+</sup> | -                                                                                  | 75(RT)            |   | 19 |
| [Zn(TPA)(DMF)]                                                                                                                       |  | Zn <sup>2+</sup> | pyridine                                                                           | 472(RT)           | - | 20 |

|                                                                          |                                                                                     |                  |                  |                                                  |   |    |    |
|--------------------------------------------------------------------------|-------------------------------------------------------------------------------------|------------------|------------------|--------------------------------------------------|---|----|----|
| Zn(II)/Cd(II)-<br>based                                                  | 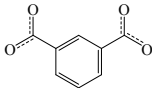   | Zn <sup>2+</sup> | -                | 1796                                             | - | 19 |    |
|                                                                          |                                                                                     |                  |                  | (77K)                                            |   |    |    |
|                                                                          |                                                                                     |                  |                  | 1321                                             |   |    | 19 |
|                                                                          |                                                                                     |                  |                  | (293K)                                           |   |    |    |
|                                                                          |                                                                                     |                  |                  | 94                                               |   | 19 |    |
|                                                                          |                                                                                     |                  |                  | (413K)                                           |   |    |    |
|                                                                          |                                                                                     | Cd <sup>2+</sup> | -                | 324                                              | - | 19 |    |
|                                                                          |                                                                                     |                  |                  | (293K)                                           |   |    |    |
| Zn/Cd-<br>terephthalate<br>(TPA)                                         |    | Zn <sup>2+</sup> | -                | 472(293                                          | - | 20 |    |
|                                                                          |                                                                                     |                  |                  | K)                                               |   |    |    |
|                                                                          |                                                                                     |                  |                  | 106                                              |   |    | 20 |
|                                                                          |                                                                                     |                  |                  | (373K)                                           |   |    |    |
|                                                                          |                                                                                     |                  |                  | 30                                               |   |    | 20 |
|                                                                          |                                                                                     |                  |                  | (293K)                                           |   |    |    |
|                                                                          |                                                                                     |                  |                  | 475                                              |   | 19 |    |
|                                                                          |                                                                                     |                  |                  | (293K)                                           |   |    |    |
|                                                                          |                                                                                     | Cd <sup>2+</sup> | -                | 158(293                                          | - | 19 |    |
|                                                                          |                                                                                     |                  |                  | K)                                               |   |    |    |
| Cd-Eu\Tb\Gd-<br>CPs                                                      |  | Cd <sup>2+</sup> | -                | 489                                              | - | 21 |    |
|                                                                          |                                                                                     |                  |                  | (77K)                                            |   |    |    |
|                                                                          |                                                                                     |                  |                  |                                                  |   |    |    |
|                                                                          |                                                                                     |                  |                  | Eu <sub>x</sub> Cd <sub>1-x</sub> O <sub>7</sub> |   |    | 21 |
|                                                                          |                                                                                     |                  |                  | 427                                              |   |    |    |
|                                                                          |                                                                                     |                  |                  | (293K)                                           |   |    |    |
|                                                                          |                                                                                     |                  |                  | 10.54                                            |   | 21 |    |
|                                                                          |                                                                                     |                  |                  | (413K)                                           |   |    |    |
|                                                                          |                                                                                     |                  |                  |                                                  |   |    |    |
|                                                                          |                                                                                     |                  |                  | Tb <sub>x</sub> Cd <sub>1-x</sub> O <sub>7</sub> |   | 21 |    |
|                                                                          |                                                                                     |                  |                  | 312                                              |   |    |    |
|                                                                          |                                                                                     |                  |                  | (293K)                                           |   |    |    |
|                                                                          |                                                                                     |                  |                  | 57.66                                            |   | 21 |    |
|                                                                          |                                                                                     |                  |                  | (293K)                                           |   |    |    |
| Ln-CPs                                                                   |  | Cd <sup>2+</sup> | Eu <sup>3+</sup> | 10.54                                            | - | 21 |    |
|                                                                          |                                                                                     |                  |                  | (RT)                                             |   |    |    |
|                                                                          |                                                                                     |                  | Tb <sup>3+</sup> | 57.66                                            |   | 21 |    |
|                                                                          |                                                                                     |                  |                  | (RT)                                             |   |    |    |
| zinc iso-<br>phthalic acid<br>(IPA)<br>based MOF<br>(denoted as<br>Y346) |  | Zn <sup>2+</sup> | rhodamine B      | 926.56                                           | - | 22 |    |
|                                                                          |                                                                                     |                  |                  | (RT)                                             |   |    |    |
|                                                                          |                                                                                     |                  |                  | 97.55                                            |   |    | 22 |
|                                                                          |                                                                                     |                  |                  | (RT)                                             |   |    |    |

|                                                                                |  |                              |                                                                                                                                                         |               |       |    |
|--------------------------------------------------------------------------------|--|------------------------------|---------------------------------------------------------------------------------------------------------------------------------------------------------|---------------|-------|----|
| NH <sup>+</sup> /Na <sup>+</sup> /K <sup>+</sup> -<br>TPA                      |  | NH <sub>4</sub> <sup>+</sup> | -                                                                                                                                                       | 586(RT)       | -     | 23 |
|                                                                                |  | Na <sup>+</sup>              |                                                                                                                                                         | 504(RT)       |       | 23 |
|                                                                                |  | K <sup>+</sup>               |                                                                                                                                                         | 585(RT)       | -     | 23 |
| [Pb <sub>2</sub> (EBTC)(<br>DMSO) <sub>3</sub> ]                               |  | Pb <sup>2+</sup>             | -                                                                                                                                                       | 4.17<br>(RT)  | -     | 18 |
| Cd-TCPA                                                                        |  | Cd <sup>2+</sup>             | [(CH <sub>3</sub> ) <sub>2</sub> NH<br>] <sub>2</sub> <sup>+</sup> cations,<br>which are<br>generated<br>from in<br>situ<br>decomposit<br>ion of<br>DMF | 472<br>(RT)   | White | 24 |
| {[Cd <sub>2</sub> (tipa) <sub>2</sub> Cl<br><sub>4</sub> ]·6 DMF} <sub>n</sub> |  | Zn <sup>2+</sup>             | -                                                                                                                                                       | -(77K)        | -     | 25 |
|                                                                                |  | Cd <sup>2+</sup>             |                                                                                                                                                         |               |       | 25 |
| C@Zn(ZIF-8)                                                                    |  | Zn <sup>+</sup>              |                                                                                                                                                         | 7400<br>(RT)  | -     | 26 |
|                                                                                |  |                              |                                                                                                                                                         | 22400<br>(RT) |       | 26 |
| C@Zn(ZIF-8)                                                                    |  | Zn <sup>2+</sup>             | Gd[(Pyr) <sub>4</sub> c<br>yclen] (Pyr<br>pyrenol)                                                                                                      | (77K)         | -     | 26 |
| Cd(m-<br>BDC)(BIM)                                                             |  | Cd <sup>2+</sup>             |                                                                                                                                                         | 755<br>(293K) | -     | 27 |
|                                                                                |  |                              |                                                                                                                                                         | 554           |       | 27 |
| Cd(m-BDC)<br>(H <sub>2</sub> O)                                                |  | Cd <sup>2+</sup>             | H <sub>2</sub> O/benzi<br>midazole(<br>BIM)                                                                                                             | 698(RT)       | -     | 27 |
|                                                                                |  |                              |                                                                                                                                                         | 404(RT)       |       | 27 |

|                    |                                                                                    |                  |                                                                                                           |             |               |           |
|--------------------|------------------------------------------------------------------------------------|------------------|-----------------------------------------------------------------------------------------------------------|-------------|---------------|-----------|
| Cd(m-BDC)(BIM)     |   | Cd <sup>2+</sup> | 4-methylumbelliferone, Fluorescent Green B, Fluorescent Green B, Rhodamine 123, Rhodamine 6G, Rhodamine B | 293(RT)     | -             | 28        |
| RhB@corone@PCN-921 |  | Zn <sup>2+</sup> | and Rhodamine B                                                                                           | 0.0625 (RT) | White (93.6%) | This work |

## References

- [1] Z. Wei, W. Lu, H. L. Jiang, H. C. Zhou, *Inorg. Chem.* **2013**, *52*, 1164.
- [2] J. Cepeda, E. S. Sebastian, D. Padro, A. Rodriguez-Dieguez, J. A. Garcia, J. M. Ugalde and J. M. Seco, *Chemical Communications*. 2016, *52*, 8671-8674.
- [3] Y. S. Yang, K. Z. Wang and D. P. Yan, *ACS Appl. Mater. Interfaces*. 2017, *9*, 17400-17408.
- [4] X. S. Xing, Z. W. Chen, L. Z. Cai, C. Sun, L. R. Cai, M. S. Wang and G. C. Guo, *RSC Adv.* 2016, *6*, 24190-24194.
- [5] T. O. Knedel, S. Buss, I. Maisuls, C. G. Daniliuc, C. Schlusener, P. Brandt, O. Weingart, A. Vollrath, C. Janiak and C. A. Strassert, *Inorg. Chem.* 2020, *59*, 7252-7264.
- [6] S. Z. Zhan, M. Li, S. W. Ng and D. Li, *Chem.-Eur. J.* 2013, *19*, 10217-10225.
- [7] Y. Ling, Z. X. Chen, Y. M. Zhou, L. H. Weng and D. Y. Zhao, *Crystengcomm*, 2011, *13*, 1504-1508.

- [8] F. Luo, G. M. Sun, A. M. Zheng, S. X. Lian, Y. L. Liu, X. F. Feng and Y. Y. Chu, *Dalton Transactions*. 2012, 41, 13280-13283.
- [9] A. J. Calahorra, A. Salinas-Castillo, D. Fairen-Jimenez, J. M. Seco, C. Mendicute-Fierro, S. Gomez-Ruiz, M. E. Lopez-Viseras and A. Rodriguez-Dieguez, *Inorganica Chimica Acta*. 2015, 427, 131-137.
- [10] X. G. Yang and D. P. Yan, *Chemical Communications*. 2017, 53, 1801-1804.
- [11] L. Chen, J. Ma, Q. H. Chen, R. Feng, F. L. Jiang and M. C. Hong, *Inorganic Chemistry Communications*. 2012, 15, 208-211.
- [12] M. S. Wang, S. P. Guo, Y. Li, L. Z. Cai, J. P. Zou, G. Xu, W. W. Zhou, F. K. Zheng and G. C. Guo, *Journal of the American Chemical Society*. 2009, 131, 13572-+.
- [13] J. P. Zhang, Y. Y. Lin, X. C. Huang and X. M. Chen, *Journal of the American Chemical Society*. 2005, 127, 5495-5506.
- [14] X. G. Yang and D. P. Yan, *Journal of Materials Chemistry C*. 2017, 5, 7898-7903.
- [15] A. A. Garcia-Valdivia, J. M. Seco, J. Cepeda and A. Rodriguez-Dieguez, *Inorg. Chem.* 2017, 56, 13897-13912.
- [16] J. M. Seco, S. Perez-Yanez, D. Briones, J. A. Garcia, J. Cepeda and A. Rodriguez-Dieguez, *Crystal Growth & Design*. 2017, 17, 3893-3906.
- [17] J. M. Seco, A. Rodriguez-Dieguez, D. Padro, J. A. Garcia, J. M. Ugalde, E. S. Sebastian and J. Cepeda, *Inorg. Chem.* 2017, 56, 3149-3152.
- [18] X. Liu, L. Zhai, W. W. Zhang, J. L. Zuo, Z. X. Yang and X. M. Ren, *Dalton Transactions*. 2017, 46, 7953-7959.
- [19] X. G. Yang and D. P. Yan, *Advanced Optical Materials*. 2016, 4, 897-905.
- [20] X. G. Yang and D. P. Yan, *Chem. Sci.* 2016, 7, 4519-4526.
- [21] Y. S. Yang, K. Z. Wang and D. P. Yan, *Chemical Communications*. 2017, 53, 7752-7755.
- [22] X. G. Yang, X. M. Lu, Z. M. Zhai, Y. Zhao, X. Y. Liu, L. F. Ma and S. Q. Zang, *Chemical Communications*. 2019, 55, 11099-11102.
- [23] Z. C. Cheng, H. F. Shi, H. L. Ma, L. F. Bian, Q. Wu, L. Gu, S. Z. Cai, X. Wang, W. W. Xiong, Z. F. An and W. Huang, *Angew. Chem.-Int. Edit.* 2018, 57, 678-682.
- [24] H. R. Fu, N. Wang, X. X. Wu, F. F. Li, Y. Zhao, L. F. Ma and M. Du, *Advanced Optical Materials*. 2020, 8, 10.



- [25] S. Yuan, Y. K. Deng and D. Sun, *Chem.-Eur. J.* 2014, 20, 10093-10098.
- [26] H. Mieno, R. Kabe, N. Notsuka, M. D. Allendorf and C. Adachi, *Advanced Optical Materials.* 2016, 4, 1015-1021.
- [27] Y. S. Yang, K. Z. Wang and D. P. Yan, *ACS Appl. Mater. Interfaces.* 2016, 8, 15489-15496.
- [28] J. B. Liu, Y. X. Zhuang, L. Wang, T. L. Zhou, N. Hirosaki and R. J. Xie, *ACS Appl. Mater. Interfaces.* 2018, 10, 1802-1809.
